# Supplementary material for: Nanoformulations of anticancer thiosemicarbazones to reduce methemoglobin formation and improve anticancer activity
Source: Royal Society of Chemistry journal article supplement (doi:10.1039/c6ra07659a), 2016-01-01
Supplement: c6ra07659a1.pdf [file c6ra07659a1.pdf]

## Supporting Information

### Nanoformulations of Thiosemicarbazone Anticancer Drugs

Britta Fischer<sup>a#</sup>, Kushtrim Kryeziu<sup>b#</sup>, Sebastian Kallus<sup>a</sup>, Petra Heffeter<sup>bc</sup>, Walter Berger<sup>bc</sup>, Christian R. Kowol<sup>\*ac</sup> and Bernhard K. Keppler<sup>ac</sup>

<sup>a</sup> Institute of Inorganic Chemistry, University of Vienna, Waehringer Str. 42,  
1090 Vienna, Austria

<sup>b</sup> Institute for Cancer Research and Comprehensive Cancer Center, Medical  
University Vienna, Borschkegasse 8a, 1090 Vienna, Austria

<sup>c</sup> Research Platform “Translational Cancer Therapy Research”, University of Vienna  
and Medical University of Vienna, Vienna, Austria

<sup>#</sup>These authors contributed equally to this work

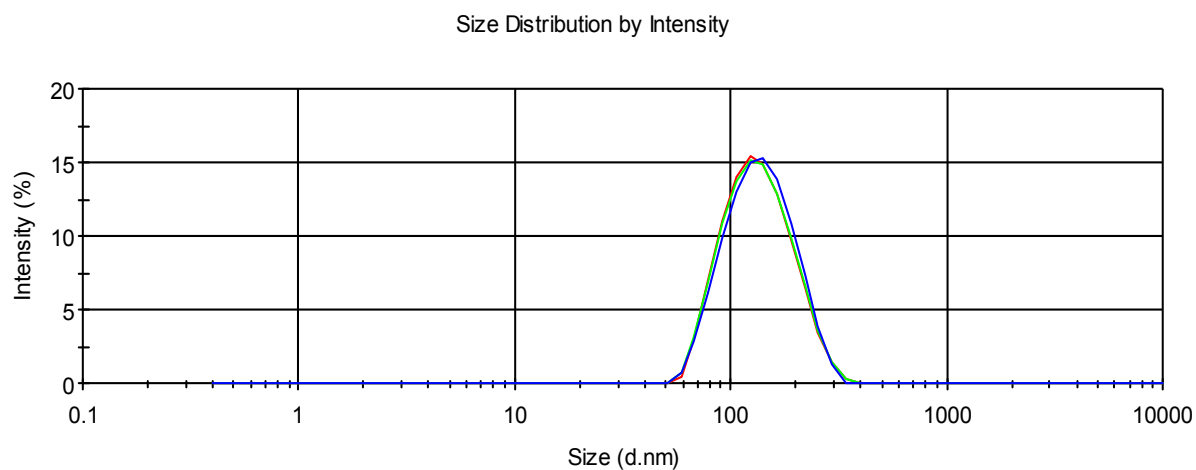

**Fig. S1** Size distribution of **Triapine-PLA** nanoparticles.

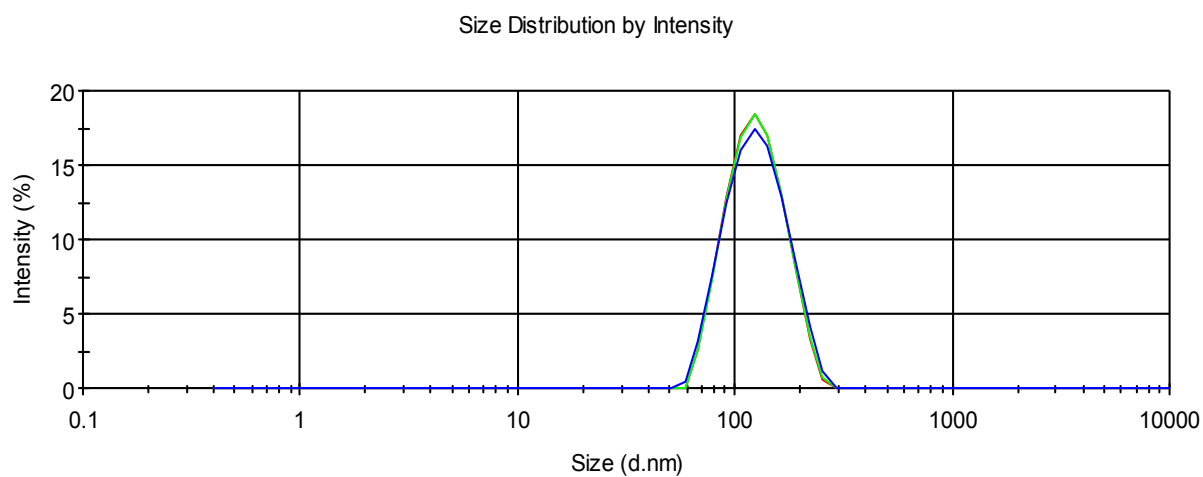

**Fig. S2** Size distribution of **Triapine-PLGA** nanoparticles.

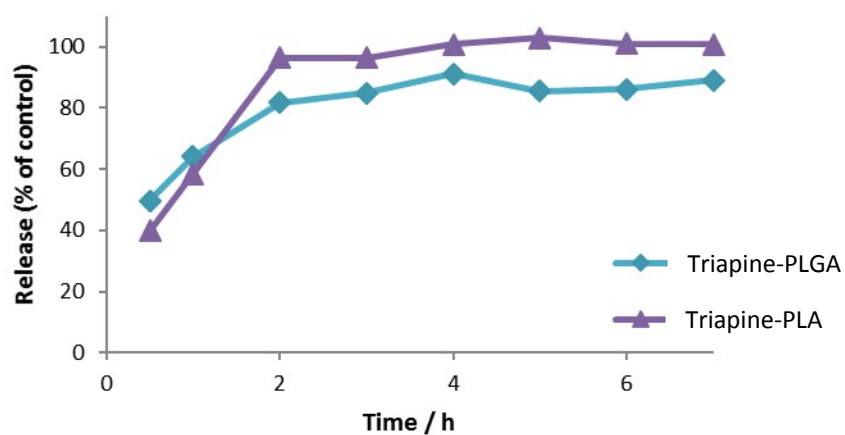

**Fig. S3** Release profile of **Triapine-PLA** and **Triapine-PLGA** nanoparticles (as positive control free Triapine was used and the highest value was set as 100%).

**Table S1** Properties of the prepared Triapine nanoparticles

| Polymer used | Average size (nm) | PDI   | Encapsulation efficiency (%) |
|--------------|-------------------|-------|------------------------------|
| PLA          | 127 ± 1           | <0.15 | 24 ± 2                       |
| PLGA         | 112 ± 2           | <0.15 | 16 ± 1                       |

**Table S2** IC<sub>50</sub> values of Triapine and Triapine-loaded PLA and PLGA nanoparticles

|               | IC <sub>50</sub> (μM) ± SD (μM) |            |
|---------------|---------------------------------|------------|
|               | SW480                           | A2780      |
| Triapine      | 0.7 ± 0.06                      | 0.6 ± 0.14 |
| Triapine-PLA  | 0.6 ± 0.01                      | 0.5 ± 0.02 |
| Triapine-PLGA | 0.8 ± 0.01                      | 0.8 ± 0.01 |
| Unloaded PLA  | >>50                            | >>50       |
| Unloaded PLGA | >>50                            | n.d.       |

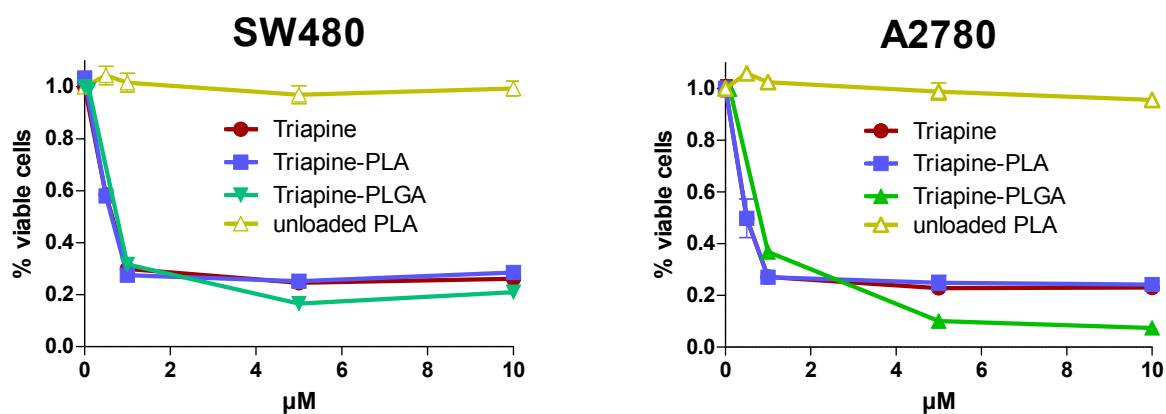

**Fig. S4** Representative dose-response curves of SW480 and A2780 cells treated with Triapine and Triapine-PLA and Triapine-PLGA nanoparticles, respectively. Cell viability was determined by MTT assay after 72 h treatment. Values given are means  $\pm$  SD of one representative experiment performed in triplicate.

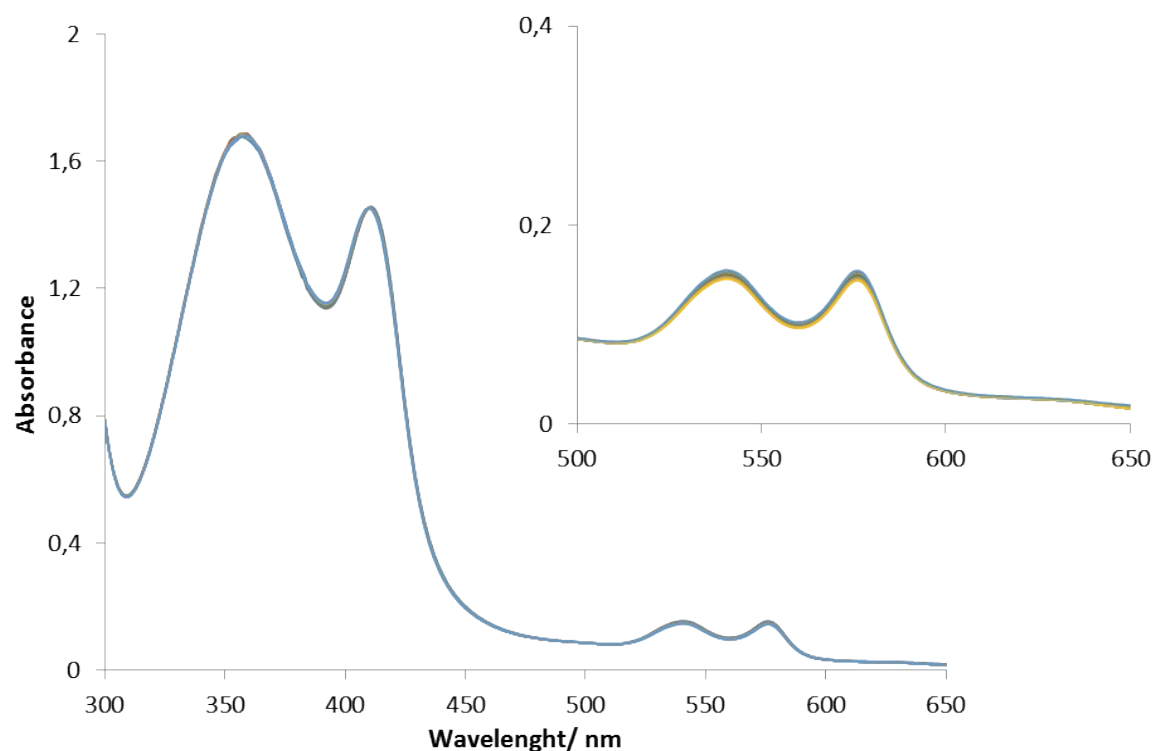

**Fig. S5** Full spectral changes of a solution of **2** and HbO<sub>2</sub> during 20 min (inset zoom of the range 500-650 nm).

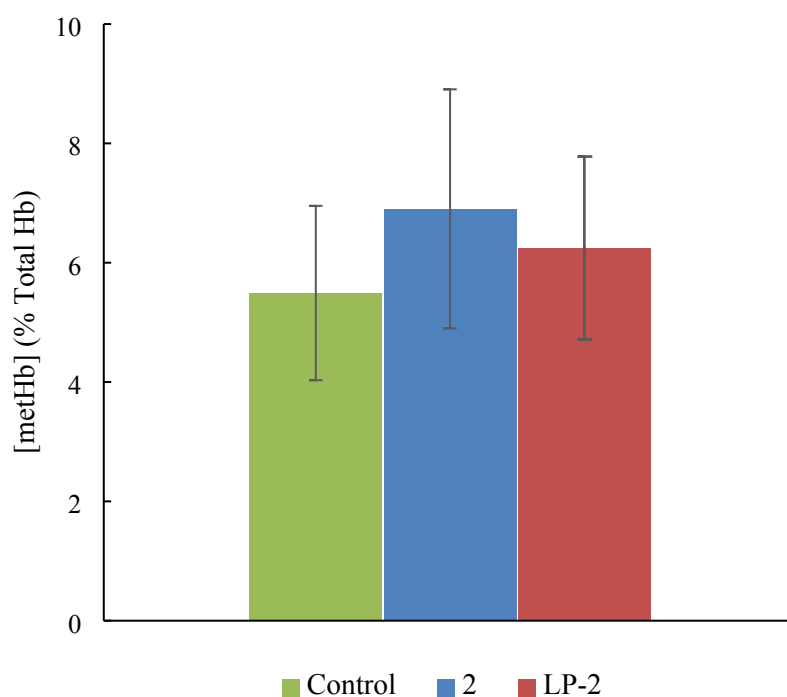

**Fig. S6** MethHb formation *in vivo* after the administration **2** or LP-2 intravenously to mice. At 60 min after administration the blood was collected and methHb levels from the RBC lysates were assayed spectrophotometrically. Results are means  $\pm$  SD (n = 4 mice/group).
